# Supplementary material for: Cation exchange on colloidal copper selenide nanosheets: a route to two-dimensional metal selenide nanomaterials
Source: Royal Society of Chemistry journal article supplement (doi:10.1039/d1tc04815e), 2021-01-01
Supplement: d1tc04815e1.pdf [file d1tc04815e1.pdf]

## Supporting Information

### Cation Exchange on Colloidal Copper Selenide Nanosheets: A Route to Two-Dimensional Metal Selenide Nanomaterials

Volodymyr Shamraienko,<sup>†</sup> Daniel Spittel,<sup>†</sup> René Hübner,<sup>‡</sup> Mahdi Samadi Khoshkhoo,<sup>§</sup> Nelli Weiß,<sup>†</sup>  
Maximilian Georgi,<sup>†</sup> Konstantin B. L. Borchert,<sup>‡</sup> Dana Schwarz,<sup>‡</sup>  
Vladimir Lesnyak,<sup>†,\*</sup> Alexander Eychmüller<sup>†</sup>

<sup>†</sup>Physical Chemistry, TU Dresden, Zellescher Weg 19, 01069 Dresden, Germany

<sup>‡</sup>Institute of Ion Beam Physics and Materials Research, Helmholtz-Zentrum Dresden-Rossendorf e.V., Bautzner Landstrasse 400, 01328 Dresden, Germany

<sup>§</sup>Institute of Materials Science and Max Bergmann Center of Biomaterials, TU Dresden, 01062 Dresden, Germany

<sup>\*</sup>Leibniz-Institut für Polymerforschung Dresden e.V., Hohe Str. 6, 01069 Dresden, Germany

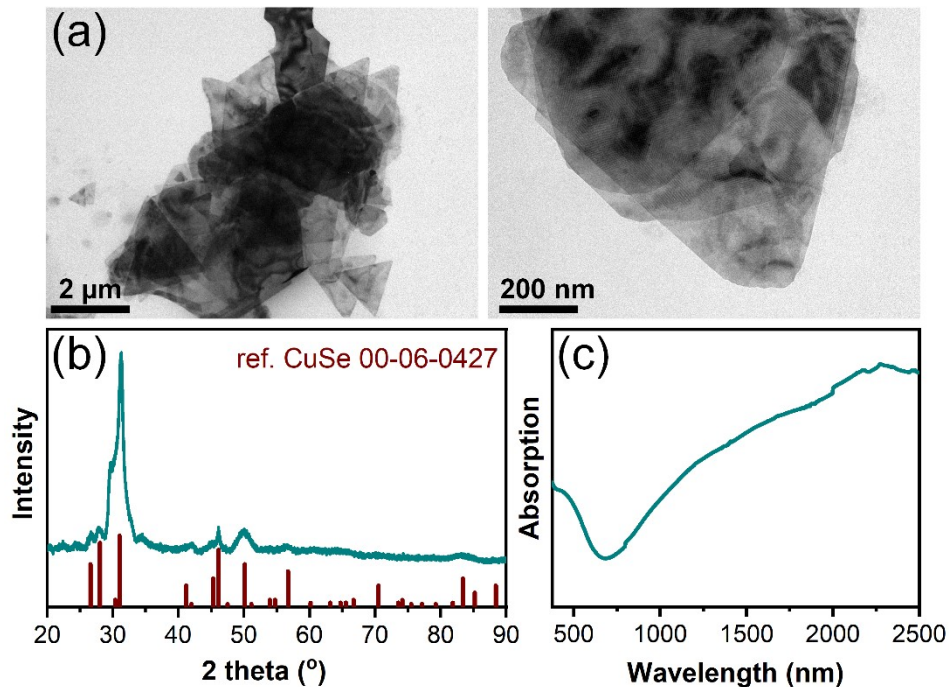

**Figure S1.** (a) TEM images showing a stack of CuSe NSs of different sizes. (b) XRD pattern of CuSe NSs with the corresponding bulk reference. (c) Absorption spectrum of CuSe NSs dispersed in TCE.

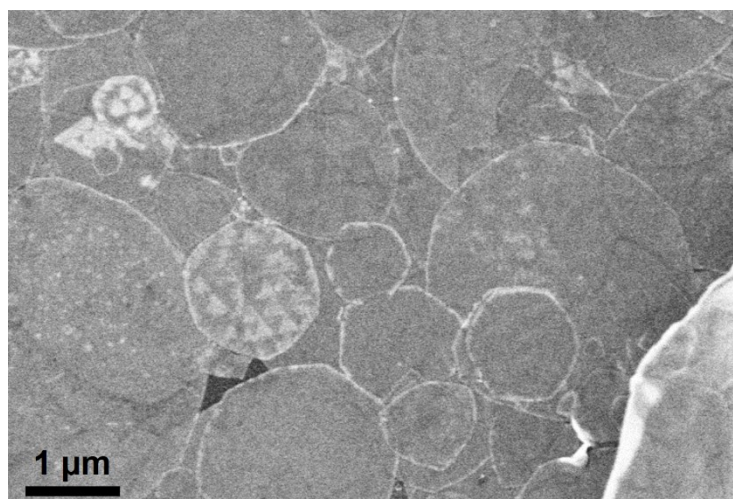

**Figure S2.** SEM image of CZTSe NSs showing their horizontal orientation in the film.

**Table S1.** Sizes of cations used in the synthesis, bond dissociation energies, and solubility product constants of the corresponding compounds in water.

| Compound | Cation                              | Cation radius (pm) | Bond dissociation energy (kJ/mol) | Solubility product    |
|----------|-------------------------------------|--------------------|-----------------------------------|-----------------------|
| CuSe     | Cu <sup>+</sup> / Cu <sup>2+</sup>  | 60 / 72            | 293                               | 2·10 <sup>-40</sup>   |
| PbSe     | Pb <sup>2+</sup>                    | 119                | 303                               | 1·10 <sup>-37</sup>   |
| HgSe     | Hg <sup>2+</sup>                    | 96                 | 167                               | 4·10 <sup>-59</sup>   |
| ZnSe     | Zn <sup>2+</sup>                    | 60                 | 136                               | 3.6·10 <sup>-26</sup> |
| SnSe     | Sn <sup>2+</sup> / Sn <sup>4+</sup> | 118 / 55           | 401                               | 5·10 <sup>-34</sup>   |

**Table S2.** Initial Cu:Zn:Sn feed ratios, reaction times, and compositions of the final CZTSe NSs determined by ICP-OES analysis.

| Initial Cu:Zn:Sn molar ratio | Reaction time (hours) | Composition                                                 | Total oxidation number balance between cations and anion, Sn <sup>2+</sup> (Sn <sup>4+</sup> ) |
|------------------------------|-----------------------|-------------------------------------------------------------|------------------------------------------------------------------------------------------------|
| 1:1:1                        | 0.5                   | Cu <sub>1.54</sub> Zn <sub>0.54</sub> Sn <sub>0.23</sub> Se | +3.08 (3.54)   -2                                                                              |
|                              | 1                     | Cu <sub>0.77</sub> Zn <sub>0.50</sub> Sn <sub>0.27</sub> Se | +2.31 (2.85)   -2                                                                              |
|                              | 2                     | Cu <sub>0.67</sub> Zn <sub>0.57</sub> Sn <sub>0.27</sub> Se | +2.35 (2.89)   -2                                                                              |
|                              | 3                     | Cu <sub>0.57</sub> Zn <sub>0.54</sub> Sn <sub>0.26</sub> Se | +2.17 (2.69)   -2                                                                              |
|                              | 4                     | Cu <sub>0.40</sub> Zn <sub>0.40</sub> Sn <sub>0.22</sub> Se | +1.64 (2.08)   -2                                                                              |
| 1:1:2                        | 4                     | Zn <sub>0.33</sub> Sn <sub>0.47</sub> Se                    | +1.60 (2.54)   -2                                                                              |
| 1:1:3                        | 4                     | Zn <sub>0.23</sub> Sn <sub>0.77</sub> Se                    | +2.00 (3.54)   -2                                                                              |
| 1:0.5:2                      | 4                     | Zn <sub>0.11</sub> Sn <sub>0.71</sub> Se                    | +1.64 (3.06)   -2                                                                              |
| 1:0.5:3                      | 4                     | Zn <sub>0.06</sub> Sn <sub>0.5</sub> Se                     | +1.12 (2.12)   -2                                                                              |

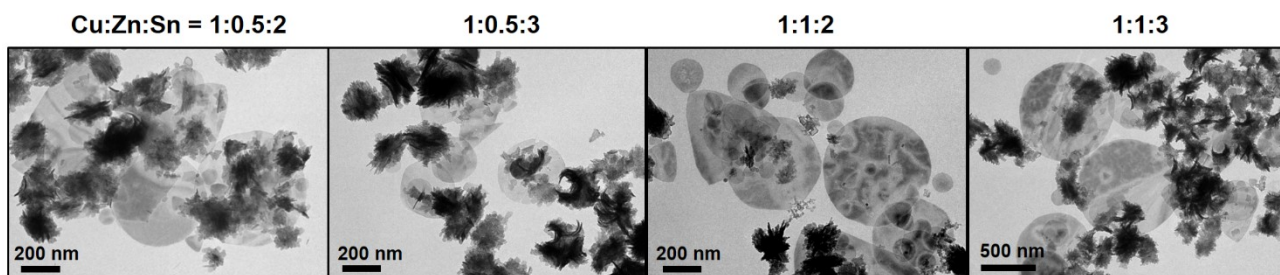

**Figure S3.** TEM images of the products of Cu<sup>+</sup>-to-Zn<sup>2+</sup>/Sn<sup>4+</sup> CE with different feed ratios between host and guest cations.

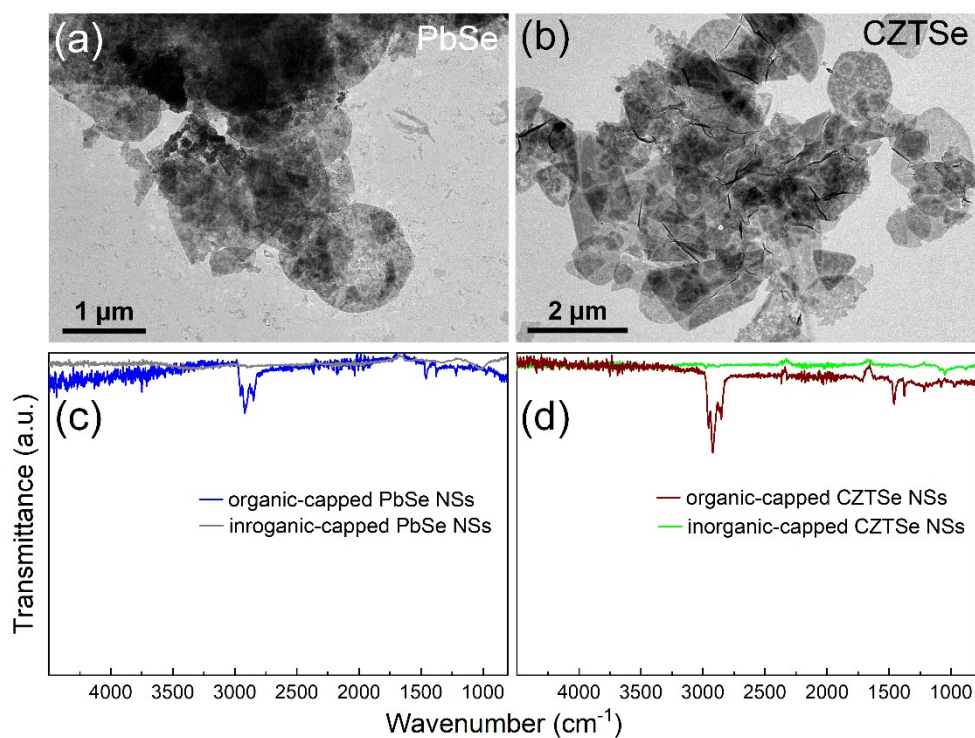

**Figure S4.** TEM images of PbSe (a) and CZTSe (b) NSs after ligand exchange. FTIR spectra of PbSe (c) and CZTSe (d) NSs after ligand exchange.
